# Supplementary material for: Comparative genomics of 11 complete chloroplast genomes of Senecioneae (Asteraceae) species: DNA barcodes and phylogenetics
Source: Bot Stud. 2019 Aug 22;60:17. doi: 10.1186/s40529-019-0265-y (PMC6706487; doi:10.1186/s40529-019-0265-y)
Supplement: Supplementary file 2 — Additional file 2: Table S2. Details of Relative Synonymous Codon Usage in chloroplast genomes of 11 species of Senecioneae. [file 40529_2019_265_MOESM2_ESM.xlsx]

## Sheet: Table S2. Codon Usage Bias
Table S2. Details of Relative Synonymous Codon Usage in chloroplast genomes of 11 species of Senecioneae
		Dendroseneio keniodendron		Dendroseneio elgonensis subsp. elgonensis		Dendrosenecio battiscombei		Dendrosenecio meruensis		Dendrosenecio johnstonii		Dendroseneio brassiciformis		Senecio keniophytum		Senecio moorei		Senecio purtschelleri		Senecio roseiflorus		Senecio schweinflorus
Amno acid	Codon	Count	RSCU	Count	RSCU	Count	RSCU	Count	RSCU	Count	RSCU	Count	RSCU	Count	RSCU	Count	RSCU	Count	RSCU	Count	RSCU	Count	RSCU
Phe	UUU(F)	982	1.31	981	1.31	979	1.31	978	1.31	979	1.31	980	1.31	994	1.27	995	1.31	991	1.31	993	1.31	997	1.32
	UUC(F)	520	0.69	521	0.69	520	0.69	520	0.69	521	0.69	521	0.69	568	0.73	519	0.69	517	0.69	522	0.69	518	0.68
Leu	UUA(L)	866	1.82	866	1.82	863	1.82	864	1.82	867	1.83	867	1.83	767	1.59	868	1.84	865	1.83	868	1.84	868	1.84
	UUG(L)	603	1.27	604	1.27	603	1.27	601	1.27	603	1.27	603	1.27	654	1.36	599	1.27	599	1.27	595	1.26	600	1.27
	CUU(L)	617	1.3	617	1.3	613	1.29	615	1.3	617	1.3	615	1.29	593	1.23	617	1.31	616	1.31	616	1.31	617	1.3
	CUC(L)	188	0.4	188	0.4	187	0.39	189	0.4	187	0.39	189	0.4	231	0.48	187	0.4	186	0.39	183	0.39	187	0.4
	CUA(L)	385	0.81	385	0.81	385	0.81	385	0.81	384	0.81	386	0.81	423	0.88	387	0.82	387	0.82	385	0.82	387	0.82
	CUG(L)	190	0.4	190	0.4	190	0.4	190	0.4	190	0.4	190	0.4	219	0.46	178	0.38	178	0.38	179	0.38	178	0.38
Ile	AUU(I)	1077	1.45	1077	1.45	1074	1.45	1076	1.45	1079	1.45	1074	1.44	1023	1.39	1083	1.46	1080	1.46	1072	1.45	1083	1.46
	AUC(I)	429	0.58	431	0.58	428	0.58	428	0.58	427	0.57	431	0.58	491	0.67	418	0.56	418	0.56	419	0.57	418	0.56
	AUA(I)	727	0.98	726	0.97	727	0.98	726	0.98	727	0.98	726	0.98	696	0.94	727	0.98	722	0.98	722	0.98	727	0.98
Met	AUG(M)	639	1	639	1	638	1	638	1	639	1	638	1	640	1	640	1	639	1	635	1	640	1
Val	GUU(V)	508	1.45	508	1.45	503	1.44	508	1.44	507	1.44	509	1.45	487	1.38	499	1.45	499	1.45	500	1.45	499	1.45
	GUC(V)	177	0.5	177	0.5	176	0.5	178	0.51	177	0.5	177	0.5	192	0.54	170	0.49	170	0.49	172	0.5	170	0.49
	GUA(V)	524	1.49	524	1.49	523	1.5	525	1.49	525	1.49	524	1.49	523	1.48	517	1.5	517	1.5	523	1.51	517	1.5
	GUG(V)	197	0.56	197	0.56	197	0.56	196	0.56	200	0.57	196	0.56	212	0.6	195	0.56	195	0.56	187	0.54	195	0.56
Ser	UCU(S)	595	1.76	595	1.76	595	1.76	594	1.76	594	1.76	595	1.76	533	1.7	589	1.76	587	1.75	589	1.76	589	1.76
	UCC(S)	311	0.92	311	0.92	310	0.92	311	0.92	310	0.92	311	0.92	287	0.92	310	0.93	309	0.92	309	0.92	310	0.93
	UCA(S)	421	1.24	420	1.24	420	1.24	421	1.24	421	1.25	421	1.24	405	1.29	422	1.26	422	1.26	411	1.23	422	1.26
	UCG(S)	168	0.5	169	0.5	169	0.5	169	0.5	167	0.49	168	0.5	181	0.58	160	0.48	160	0.48	167	0.5	160	0.48
	AGU(S)	412	1.22	412	1.22	412	1.22	412	1.22	413	1.22	411	1.22	352	1.12	407	1.21	407	1.22	409	1.22	407	1.21
	AGC(S)	123	0.36	123	0.36	123	0.36	122	0.36	122	0.36	123	0.36	120	0.38	122	0.36	122	0.36	121	0.36	122	0.36
Pro	CCU(P)	416	1.53	416	1.53	414	1.53	415	1.54	415	1.53	415	1.53	373	1.41	406	1.5	405	1.51	403	1.5	406	1.5
	CCC(P)	198	0.73	198	0.73	197	0.73	195	0.72	198	0.73	197	0.73	194	0.73	201	0.74	200	0.74	201	0.75	201	0.74
	CCA(P)	328	1.21	327	1.2	327	1.21	325	1.2	326	1.2	325	1.2	325	1.23	329	1.22	327	1.22	327	1.22	329	1.22
	CCG(P)	146	0.54	147	0.54	146	0.54	146	0.54	146	0.54	147	0.54	169	0.64	144	0.53	144	0.54	141	0.53	144	0.53
Thr	ACU(T)	529	1.6	529	1.6	527	1.6	527	1.6	529	1.6	528	1.6	452	1.53	536	1.63	536	1.63	529	1.62	536	1.63
	ACC(T)	241	0.73	241	0.73	242	0.74	244	0.74	244	0.74	241	0.73	207	0.7	229	0.7	229	0.7	230	0.7	229	0.7
	ACA(T)	414	1.25	414	1.25	412	1.25	412	1.25	413	1.25	412	1.25	383	1.3	412	1.25	412	1.25	411	1.26	412	1.25
	ACG(T)	137	0.41	137	0.41	136	0.41	137	0.42	138	0.42	136	0.41	136	0.46	138	0.42	138	0.42	138	0.42	138	0.42
Ala	GCU(A)	626	1.75	626	1.75	625	1.76	626	1.75	627	1.75	626	1.75	528	1.7	620	1.76	620	1.76	614	1.75	620	1.76
	GCC(A)	233	0.65	233	0.65	232	0.65	234	0.66	233	0.65	233	0.65	205	0.66	232	0.66	232	0.66	230	0.65	232	0.66
	GCA(A)	407	1.14	407	1.14	405	1.14	407	1.14	407	1.14	407	1.14	366	1.18	408	1.15	408	1.15	403	1.15	408	1.15
	GCG(A)	163	0.46	163	0.46	162	0.46	162	0.45	163	0.46	163	0.46	142	0.46	153	0.43	153	0.43	159	0.45	153	0.43
Tyr	UAU(Y)	810	1.64	810	1.64	807	1.64	808	1.64	808	1.64	811	1.64	795	1.56	800	1.63	799	1.63	798	1.63	801	1.63
	UAC(Y)	179	0.36	179	0.36	176	0.36	179	0.36	179	0.36	179	0.36	225	0.44	181	0.37	181	0.37	181	0.37	182	0.37
His	CAU(H)	456	1.5	456	1.5	456	1.5	457	1.5	456	1.5	456	1.5	435	1.43	454	1.51	454	1.51	453	1.51	454	1.51
	CAC(H)	153	0.5	153	0.5	153	0.5	153	0.5	153	0.5	153	0.5	174	0.57	147	0.49	147	0.49	146	0.49	147	0.49
Gln	CAA(Q)	714	1.51	714	1.51	711	1.51	714	1.51	715	1.51	713	1.52	723	1.47	700	1.52	700	1.52	701	1.52	700	1.52
	CAG(Q)	230	0.49	230	0.49	228	0.49	229	0.49	231	0.49	228	0.48	264	0.53	220	0.48	220	0.48	219	0.48	220	0.48
Asn	AAU(N)	1017	1.55	1018	1.55	1014	1.55	1014	1.55	1015	1.55	1014	1.55	916	1.51	1004	1.55	1002	1.55	1003	1.55	1005	1.55
	AAC(N)	293	0.45	293	0.45	291	0.45	293	0.45	292	0.45	293	0.45	300	0.49	293	0.45	293	0.45	290	0.45	293	0.45
Lys	AAA(K)	1026	1.47	1024	1.47	1018	1.47	1022	1.47	1025	1.47	1023	1.46	1016	1.45	1030	1.47	1027	1.47	1031	1.48	1030	1.47
	AAG(K)	372	0.53	373	0.53	370	0.53	372	0.53	372	0.53	374	0.54	389	0.55	370	0.53	370	0.53	364	0.52	370	0.53
Asp	GAU(D)	838	1.59	838	1.59	834	1.59	838	1.59	838	1.59	838	1.59	743	1.56	841	1.6	838	1.6	840	1.6	841	1.6
	GAC(D)	214	0.41	214	0.41	214	0.41	214	0.41	214	0.41	214	0.41	210	0.44	212	0.4	212	0.4	213	0.4	212	0.4
Glu	GAA(E)	995	1.48	995	1.48	992	1.48	993	1.48	995	1.48	995	1.48	929	1.46	990	1.48	990	1.48	990	1.48	990	1.48
	GAG(E)	351	0.52	351	0.52	350	0.52	351	0.52	351	0.52	351	0.52	345	0.54	352	0.52	352	0.52	350	0.52	352	0.52
Cys	UGU(C)	210	1.4	210	1.4	209	1.39	209	1.39	210	1.39	209	1.4	233	1.38	209	1.4	209	1.4	208	1.41	209	1.4
	UGC(C)	91	0.6	91	0.6	91	0.61	91	0.61	92	0.61	90	0.6	105	0.62	90	0.6	90	0.6	87	0.59	90	0.6
Trp	UGG(W)	453	1	453	1	453	1	453	1	452	1	453	1	459	1	452	1	452	1	454	1	452	1
Arg	CGU(R)	346	1.29	347	1.29	345	1.29	342	1.29	343	1.28	345	1.29	299	1.16	342	1.31	342	1.31	346	1.32	342	1.31
	CGC(R)	112	0.42	112	0.42	113	0.42	113	0.42	112	0.42	112	0.42	99	0.38	104	0.4	104	0.4	104	0.4	104	0.4
	CGA(R)	351	1.31	350	1.31	346	1.3	349	1.31	351	1.31	350	1.31	334	1.3	347	1.32	347	1.33	344	1.31	347	1.32
	CGG(R)	118	0.44	118	0.44	117	0.44	117	0.44	119	0.44	117	0.44	146	0.57	118	0.45	118	0.45	114	0.43	118	0.45
	AGA(R)	505	1.88	505	1.88	502	1.88	500	1.88	503	1.88	502	1.88	491	1.9	494	1.89	493	1.88	496	1.89	494	1.89
	AGG(R)	177	0.66	177	0.66	177	0.66	175	0.66	177	0.66	176	0.66	178	0.69	167	0.64	167	0.64	170	0.65	167	0.64
Gly	GGU(G)	588	1.32	588	1.32	586	1.32	587	1.32	587	1.32	588	1.32	526	1.3	574	1.31	574	1.31	579	1.32	574	1.31
	GGC(G)	196	0.44	196	0.44	195	0.44	195	0.44	195	0.44	196	0.44	192	0.48	190	0.43	190	0.43	188	0.43	190	0.43
	GGA(G)	700	1.57	700	1.57	698	1.57	702	1.57	703	1.58	699	1.57	602	1.49	690	1.58	690	1.58	685	1.57	690	1.58
	GGG(G)	299	0.67	299	0.67	299	0.67	300	0.67	297	0.67	301	0.67	293	0.73	297	0.68	296	0.68	296	0.68	297	0.68
Stop	UAA(*)	49	1.65	49	1.65	48	1.64	49	1.65	49	1.65	49	1.65	210	1.1	49	1.69	49	1.69	48	1.66	49	1.69
	UAG(*)	23	0.78	23	0.78	23	0.78	23	0.78	23	0.78	23	0.78	195	1.02	21	0.72	21	0.72	23	0.79	21	0.72
	UGA(*)	17	0.57	17	0.57	17	0.58	17	0.57	17	0.57	17	0.57	170	0.89	17	0.59	17	0.59	16	0.55	17	0.59
		26380		26382		26293		26335		26369		26354		26067		26172		26134		26100		26177
ENC		49.928		49.94		49.943		49.95		49.947		49.939		51.492		49.758		49.77		51.487		49.758
CBI		0.353		0.352		0.353		0.352		0.353		0.352		0.309		0.356		0.356		0.308		0.356
Note: ENC= Effective Number of Codons; CBI=Codon Bias Index
